# Supplementary material
Source: PubMed Central journal article supplement (PMC2449328)
Supplement: 0711988105_0711988105SI.pdf [file 0711988105_0711988105SI.pdf]

# Supporting Information

Supporting Information Corrected February 06, 2015

Berger *et al.* 10.1073/pnas.0711988105

## SI Text

**Arizona 2000 General Election.** This election provided a particularly good place to examine our hypothesis for a number of reasons. First, it contained an initiative on which we predicted polling place might influence voting behavior. Ballot initiatives provide an ideal setting for studying the effects of polling place type on voting behavior because they focus primarily on a single policy dimension (e.g., school funding). In contrast, candidates generally take positions on issues spanning numerous policy dimensions. Because the environmental cues associated with a polling location could relate to these different dimensions in complex or

conflicting ways, a single initiative provides a more straightforward test. Second, observing voting behavior on the numerous other initiatives on which we did not expect any influence of polling locations provides a means of estimating voters' policy preferences. This is important because it allows us to disentangle differences in the policy preferences of the set of people who vote in schools from the effect of voting in the school itself. Third, we were able to collect polling place locations and voting returns for every precinct in the state. This is nontrivial because polling locations are generally determined at the county level, with no centralized source of statewide information.

**Table S1. Demographics and raw voting percentages for people who voted in schools compared with other locations and comparison groups**

| Polling location                     | School   | Not a school | Comparison groups         |                           |
|--------------------------------------|----------|--------------|---------------------------|---------------------------|
|                                      |          |              | Schools within 0.20 miles | Schools within 0.40 miles |
| Presidential votes                   | 368,857  | 989,306      | 160,078                   | 710,183                   |
| Percentage white                     | 81.22    | 84.80        | 80.93                     | 80.82                     |
| Percentage population 5–17           | 21.22    | 15.77        | 18.68                     | 18.24                     |
| Percentage population 65+            | 9.75     | 20.41        | 13.62                     | 12.96                     |
| Percentage owner-occupied properties | 77.04    | 73.38        | 68.84                     | 68.01                     |
| Median household income              | \$55,255 | \$49,347     | \$47,282                  | \$46,825                  |
| Percentage yes on Proposition 301    | 56.02    | 53.99        | 54.37                     | 54.76                     |

Information corresponds to the census block containing the polling location and the data are weighted by number of votes in each polling location.
